# **An icosahedral virus as a fluorescent calibration standard: methods for counting protein molecules in cells by fluorescence microscopy**

John M. Murray

Department of Biology, Indiana University, Bloomington, IN, 47405, USA

Running title: Counting protein molecules in cells

corresponding author:

[murrayjo@indiana.edu](mailto:murrayjo@indiana.edu)

## Abstract

The ability to replace genes coding for cellular proteins with DNA that codes for fluorescent protein-tagged versions opens the way to counting the number of molecules of each protein component of macromolecular assemblies *in vivo* by measuring fluorescence microscopically. Converting fluorescence to absolute numbers of molecules requires a fluorescent standard whose molecular composition is known precisely. In this report the construction, properties, and mode of using a set of fluorescence calibration standards are described. The standards are based on an icosahedral virus particle containing exactly 240 copies of one of seven different fluorescent proteins. Two applications of the fluorescent standards to counting molecules in the human parasite *Toxoplasma gondii* are described. Methods for improving the precision of the measurements and avoiding potential inaccuracies are emphasized.

# Introduction

An extremely powerful tool for cell biologists became available with the advent of the fluorescent proteins (FP's) (Giepmans et al., 2006). With this tool, and with the ability to engineer in many organisms homologous replacements of endogenous genes with FP-tagged versions of those genes, it should in principle be possible to count the absolute number of molecules of a specific protein in a living cell, by measuring the amount of fluorescence emitted by the FP-tagged protein. Many examples of this application have been reported (for review, see (Verdaasdonk et al., 2014)).

Among the motivations for wanting to know the absolute number of molecules of specific proteins, one that has not yet received widespread attention is the use of such numbers as constraints in constructing detailed structural models of large macromolecular assemblies whose overall 3D structure has been determined by electron microscopy. The new direct-electron detectors are revolutionizing structure determination by cryo-electron microscopy, and the size of assemblies whose structure can be determined to sub-nm resolution by this method continues to increase (Zhou, 2011; Grigorieff, 2013; Harapin et al., 2013; Bai et al., 2014). In the past, determining the stoichiometric relationships among the different protein components of macromolecular assemblies often depended on analysis of band intensities in Coomassie-stained SDS polyacrylamide gels. Although those gel-derived stoichiometries were critical in constraining hypotheses about the arrangement of proteins in the 3D structure (e.g., (Amos, 1977)), their use was fraught with difficulties stemming from the uncertain relationship between abundance in cell lysates or subcellular fractions to abundance in specific subcellular organelles and assemblies within cells. Counting molecules based on light microscopic imaging of specific proteins within an intact assembly in a living cell removes those uncertainties, and should thus become a powerful enabling technology for molecular structure determination by cryoEM.

In order to convert the measured fluorescence into the absolute number of molecules, some sort of calibration standard is required. For the most part, the different attempts to count molecules in this way have each used a different means of calibration. It would be useful for cell biologists to have a set of shared calibration standards that could be used by anyone for comparing results from different labs. An ideal shared standard would have at least these properties: wide accessibility, convenience, reproducibility, and long-term stability. It should also have well characterized and documented properties, and be extensible to new fluorescent proteins as they become available. I report here the production and properties of a candidate set of fluorescent standards, based on an alphavirus particle whose genome has been modified to express an-FP tagged version of a capsid protein. The particles are bright, stable, and have ultimate reproducibility, as they are self-replicating entities. Two examples of the application of these standards to counting proteins in cells are described.

Accurate counting presupposes accurate measurement of fluorescence, and because the motivation for counting is frequently to compare two counts, the precision of counting is also of central concern. I report an extended analysis of the sources of and scale of inaccuracies and limits to precision that are inherent in using FP's in this way to count molecules in cells, and some methodological recommendations to minimize those errors.

## Results

### *Construction of fluorescent Sindbis virus*

Virus particles of known 3D structure have several advantages to recommend them as platforms for constructing fluorescence standards. The particles are small, stable, well-characterized, identical, self-replicating, and simple to prepare in a quantity that is very large compared to what is needed. Sindbis virus is a small (~60 nm) spherical alphavirus (Lloyd, 2009) that includes an 11.7 kb single-stranded RNA enclosed in an inner protein shell (nucleocapsid) made from the virally encoded CP protein, and an outer protein shell formed from 80 glycoprotein spikes, each spike containing three copies of a heterodimer assembled from viral proteins E1 and E2. A lipid bilayer derived from the host membrane lies between the two protein shells. The outer protein shell has T=4 icosahedral symmetry; i.e., there are exactly 240 copies of the E1-E2 heterodimer per virion (Mukhopadhyay et al., 2006). Several fluorescently tagged versions of Sindbis capsid proteins have been described, and a 3D structure of mCherryFP-E2 Sindbis determined by cryoEM was recently published (Jose et al., 2015), demonstrating that each mature viral particle contains 240 copies of the mCherryFP-E2 fusion protein as expected.

Fluorescent Sindbis virus genomes were constructed for eight commonly used fluorescent proteins: mAppleFP, mCerulean3FP, mCherryFP, EGFP, mEmeraldFP, mNeonGreenFP, tdTomatoFP, and mVenusFP). The constructs differ from previously published FP-E2 fusion proteins only by the short flexible linkers used to couple the C-terminus of the FP to the N-terminus of E2 (AAAGSG), and C-terminus of E3 to N-terminus of the FP prior to furin cleavage (GAPGSA). Monolayer cultures of BHK-21 or Vero cells transfected with RNA produced by *in vitro* transcription from any of the constructed genomes (Rice et al., 1987) showed scattered brightly fluorescent single cells or small groups of cells within 6 hours after transfection (Figure 1). For seven of the eight constructs, the entire monolayer became fluorescent 24-36 hours after transfection, and infectious virus particles became abundant in the culture supernatant, with titers of  $10^3$ - $10^7$ /mL. Two of the constructs (EGFP and tdTomatoFP) readily produced fluorescent single cells after transfection with RNA, but rarely did the fluorescence spread to neighboring cells, and culture supernatants contained <10 pfu/mL of infectious virions.

The failure to generate an infectious viral particle incorporating tdTomatoFP-E2 is perhaps not surprising, as tdTomatoFP is a tandem dimer, twice the size of the other FP's used here, and huge compared to the small E3 protein (476 versus 64 amino acid residues) it would replace in the maturing viral particles. However, the failure with EGFP was both a surprise and puzzling. EGFP has been used in live cell imaging applications far more often than any other FP, and has become something of a gold standard against which the performance of other FP's in fusion proteins is assessed. At first glance, the effective FP's seemed to have little in common to distinguish them from EGFP. Some of the effective FP's were color variants differing in only a few amino acids from the *Aequorea victoria* derived EGFP such as mVenusFP and mCerulean3FP, but equally effective were *Discosoma sp* and *Branchiostoma lanceolatum* derived proteins such as mAppleFP, mCherryFP, and mNeonGreenFP, which have very little sequence homology to EGFP. One characteristic that does distinguish the effective FP's from EGFP is the presence in the former of dimerization-blocking mutations such as the A206K or L221K substitutions in the *Aequorea victoria* derived proteins. Although EGFP has only a weak tendency to dimerize and typically behaves well as a fusion partner in living cells, its residual dimerization capacity is higher than other more modern derivatives, as can be observed in an assay that measures tendency to oligomerize *in vivo* (Zacharias et al., 2002) (Costantini et al., 2012) (Cranfill et al., 2016). Swapping

the EGFP coding sequence in EGFP-Sindbis with a mutant changed by a single amino acid residue, the monomerizing mutation L221K (Zacharias et al., 2002), produced a construct that yielded titers of infectious virions comparable to the other fluorescent Sindbis virions, confirming that even the rather weak dimerizing tendency of standard EGFP (L221) is sufficient to interfere with assembly of infectious virus particles.

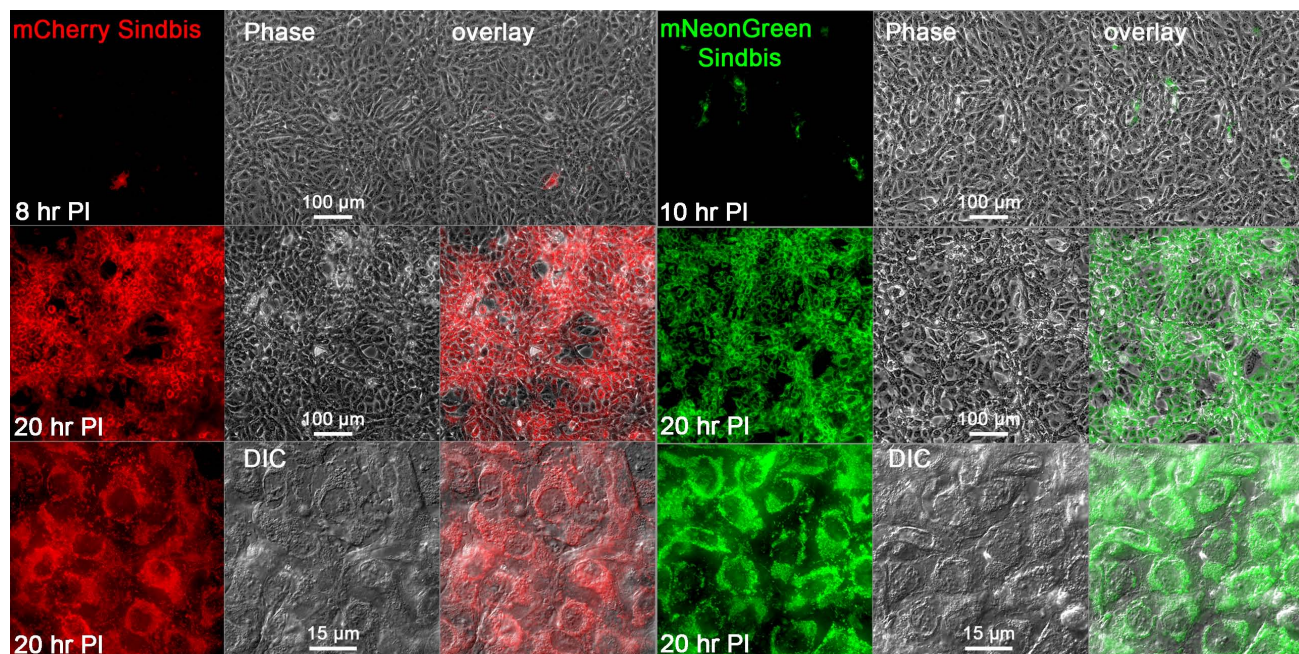

**Figure 1.** Infection of Vero cells with fluorescent Sindbis virus. (Left) Fluorescence and phase contrast or DIC images of a monolayer culture of cells 8 and 20 hours post-inoculation with mCherryFP Sindbis. (Right) Images of a monolayer culture of cells 10 and 20 hours post-inoculation with mNeonGreenFP Sindbis.

### *Characterization of fluorescent Sindbis virus*

Centrifugation of culture supernatant from cultures of cells infected with fluorescent Sindbis virus and examination of the supernatant by fluorescence microscopy reveals numerous sub-resolution fluorescent dots (Figure 2). The virus suspensions are stable for many months when stored in buffer at 4°C. For longer term storage, the virus suspensions can be frozen and stored at -80°C for years with little loss. A few  $\mu$ L of frozen virus suspension scraped from the surface of a frozen vial is sufficient to infect a flask of host cells, yielding many mL of concentrated virus suspension in a few days. Serial re-amplification leads to takeover of the population by mutant dark forms after 5-10 passages, but as only a few  $\mu$ L of the original stock are needed for each amplification, and only 10-20  $\mu$ L of the amplified product are needed for imaging, the supply

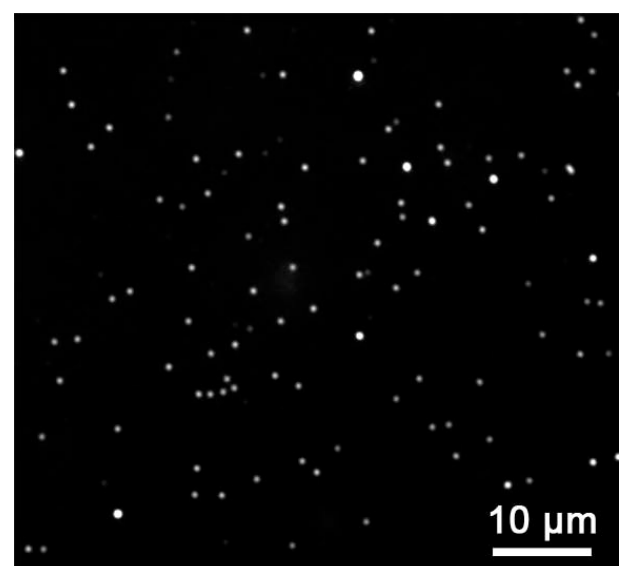

**Figure 2.** Epifluorescence microscope image of mCherryFP Sindbis virions



of fluorescent virus, once made by transfection of host cells with *in vitro* transcribed viral RNA (see Methods), is in practice inexhaustible.

Quantitative intensity measurements on a large number of fluorescent spots from cultures of different color variants show unimodal or bimodal distributions with one large peak and a much smaller second peak of twice the brightness, presumably corresponding to single virions and unresolved pairs (Figure 3).

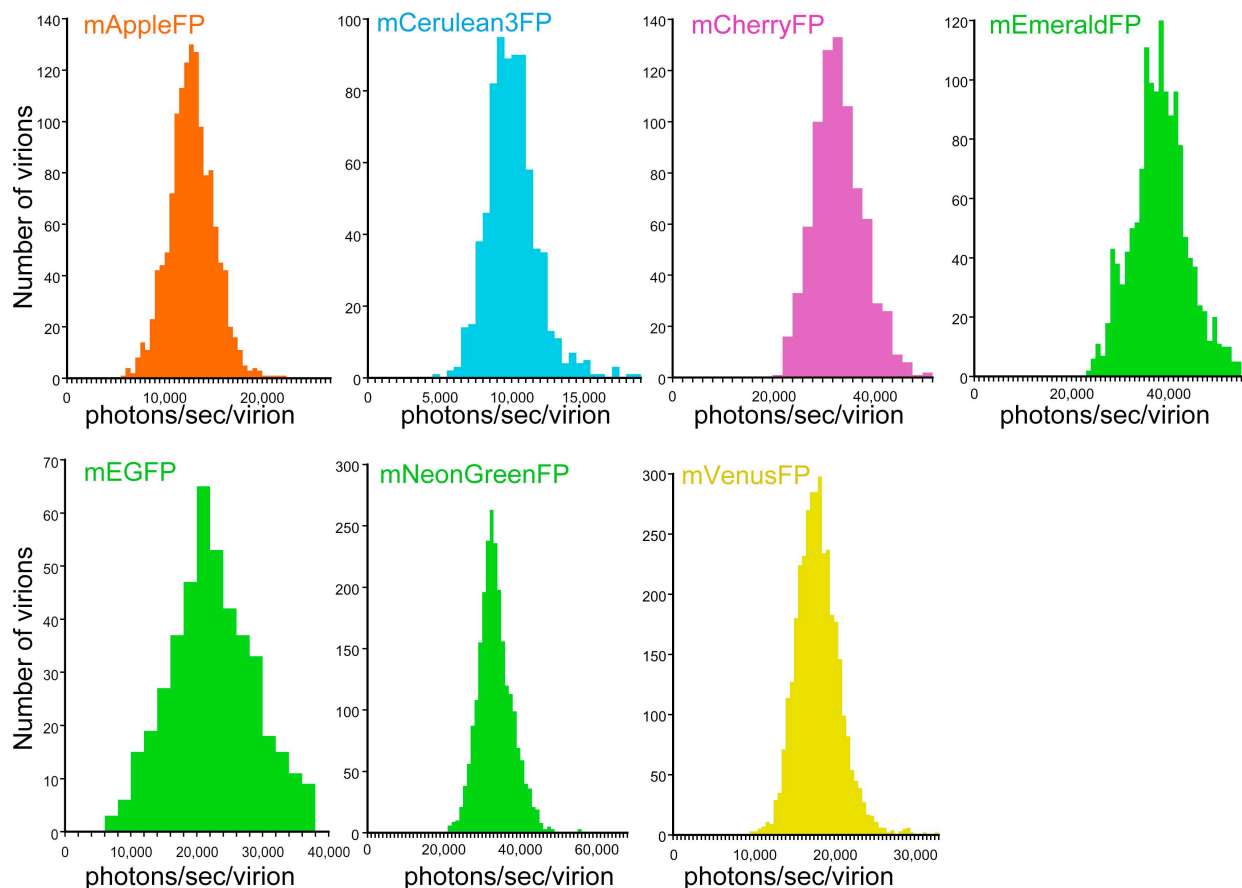

**Figure 3.** Images and histograms of measured brightness of various fluorescent Sindbis viruses. Brightness is given as detected photons per second per virus particle, net after background correction.

### *Analysis of the precision of measured brightness*

In the images of fluorescent Sindbis virions shown in Figure 2, each virion is represented by  $1-4 \times 10^4$  photons. Ideally, the precision of measurement of the brightness of an individual virus particle would be limited only by Poisson noise, which in this case would be at most 1%. However, as the histograms show, the variation in measured brightness among individual virus particles in a large population is 10-30 fold larger than this ideal for all of the color variants. This was a cause for concern, since it opened the possibility that there was some intrinsic heterogeneity in the population. If the number of fluorescent capsid protein molecules incorporated into each virion were not precisely 240 as expected on the basis of their icosahedral symmetry, but instead varied from virion to virion, then the accuracy of molecular counting utilizing these engineered viruses as fluorescent standards

would be compromised. To address this possibility, an extensive set of experimental analyses and computational modeling was carried out.

Where is the “extra” noise coming from? One possibility is that the microscope/light source/camera system is introducing noise. To investigate this possibility, the amount of noise present in images of three radically different objects was determined. First, light from a battery powered (to avoid line-frequency fluctuations) incandescent source, diffused through a strongly scattering oil-in-water emulsion (diluted cream), was directed to the camera through the microscope optics. One hundred images were acquired in rapid succession and the total intensity in a small region was summed (Figure 4). The same measurements were carried out using light from the microscope mercury arc illumination system reflected off a mirror, and also using the fluorescence generated in a “lake” of fluorophore in aqueous solution. In all three cases, the variance of intensity was as predicted for simple Poisson noise. Thus any noise contribution from the imaging/detection system is insignificant compared to the inescapable Poisson noise in these images.

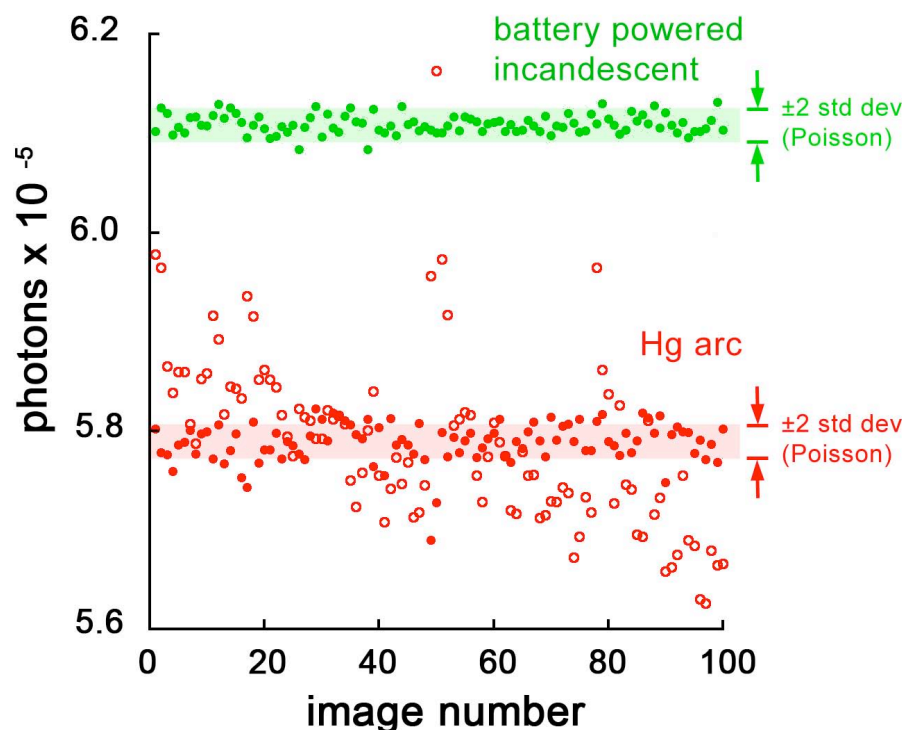

**Figure 4** Imaging system noise level. The graph shows measurements of the total intensity in a 7 x 7 pixel box from 100 sequential images. The source of light was either a battery powered incandescent bulb (flashlight) viewed through a strongly scattering medium (*green*) or the output from the microscope’s Hg arc lamp reflected from a mirror in front of the objective lens (*red*). For the Hg arc, open circles show the raw intensities, closed circles show the intensities after correction for fluctuations in the Hg arc output, measured by a photosensor. The shaded bars show the expected range of variation due solely to Poisson noise.

One common source of brightness variation in fluorescence images is non-uniform illumination across the field of view. Figure 5 shows a typical example, an image of a thin layer of solution of a fluorophore, with intensities scaled relative to a value of 1.0 for the maximum. The three blue rings mark the contours at 90, 80, and 70% of maximum intensity. The center of symmetry of the illumination pattern, marked with an “X”, is offset from the center of the field of view of the camera (small red circle), which in turn is slightly offset from the optical axis of the imaging system (larger green circle). “Flat-fielding”, dividing every image by a scaled (maximum = 1.0) image of an object known to be uniformly fluorescent, is a common way of compensating for this non-uniformity in illumination. The images of fluorescent Sindbis virions were flat-fielded in this way before analysis, and in addition the portion of the images used for analysis was restricted to the area inside the 85% contour. The effectiveness of this procedure can be judged from Figure 6, a plot of measured intensity of fluorescent Sindbis virions (after flat-fielding) versus radial distance from the center of the illumination pattern. There is no significant correlation of measured intensity with radius. Thus the differences in measured brightness among fluorescent virions is not due to ineffective compensation for non-uniform illumination. Although flat-fielding works reasonably well in this instance, a more robust solution to the problem is to assess brightness of the virions utilizing a quantitative measure that is insensitive to illumination intensity as described below.

**Figure 5.** Illustration of non-uniform illumination. An image of a uniformly fluorescent sample was scaled relative to its maximum value, set to 1.0. Blue rings mark contours at 90, 80, and 70% of maximum intensity. “X”, center of symmetry of the illumination pattern; small red circle, center of the image; larger green circle, optical axis of the imaging system.

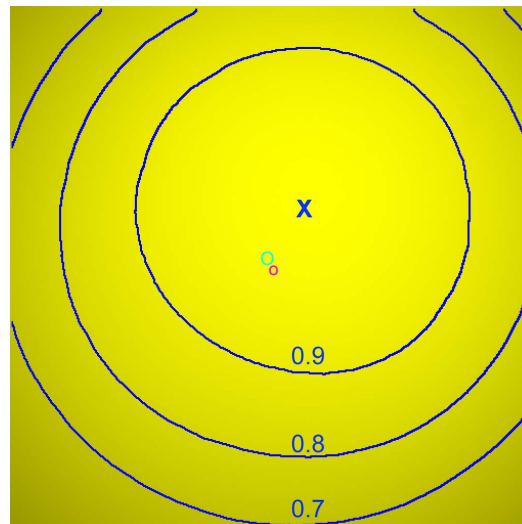

**Figure 6.** Plot of measured intensity of fluorescent virions (after flat-fielding) versus radial distance from the center of symmetry of the illumination pattern. No significant correlation between measured intensity and location in the image is observed.

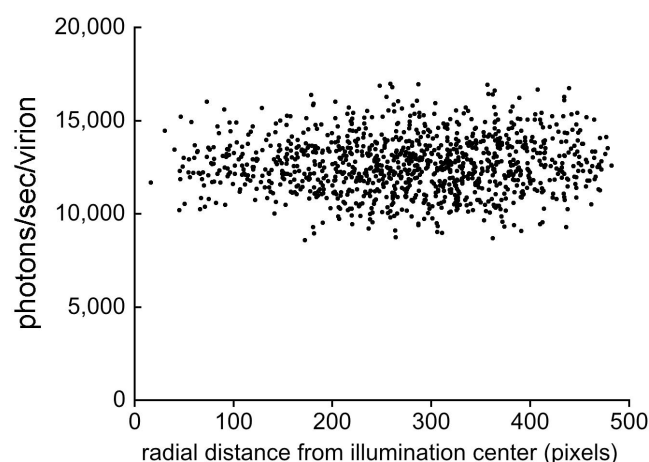

Several other possible causes of variable brightness were considered and rejected. (1) Many of the images of fluorescent virions were collected using an oil immersion or silicone immersion lens with



NA larger than the refractive index of the aqueous buffer in which the samples were mounted. Thus, in addition to the far-field illumination bathing the virions, there will have been an evanescent field whose intensity decayed exponentially with distance from the coverslip-buffer interface. Conceivably, there might be small differences in the distance of each virion from the coverslip, which would be manifested as differences in intensity of the evanescent field, and hence differences in the amount of fluorescence generated from each virion. This was ruled out by imaging with a water immersion lens, which cannot generate an evanescent field at the coverslip-buffer interface. The “extra” variance in the images acquired with the water immersion objective was not reduced compared to images acquired with an oil immersion objective. (2) The photophysical properties of the fluorescent proteins are complex (Day and Davidson, 2014). Transient “blinking” of emitted fluorescence has been described, but, this is a stochastic property of single FP molecules, and therefore seemed unlikely to have much effect on the aggregated fluorescent output from an ensemble of 240 molecules unless there were some completely unknown mechanism that synchronized their blinking. However, other peculiarities such as reversible photobleaching, and rapid initial decay of intensities followed by much slower “normal” photobleaching have also been described. Under certain conditions, both of these behaviors can be observed in some color variants of the fluorescent Sindbis virions, as described in a later section. As a general check for the contributions to the noise from any sort of time-dependent photophysical behavior, images of virions were collected using exposure times ranging from 5 msec to 5 sec, and successive images of the same field of view were obtained with very short or very long exposure times combined with very short or very long (50 msec, 1 minute) intervals between the exposures. None of these protocols had any significant effect on the variance in measured brightness among fluorescent virus particles.

A clue to the origin of the unexpectedly large variance came from empirical observation of increased variance in images from slides that for some reason had noticeably higher background fluorescence. Normally the background fluorescence in images of the fluorescent Sindbis is very low, of the order of 1% of the fluorescence of a virus particle. Thus I had assumed that the very low background could not contribute significantly to the observed large variation in virus particle brightness. Nevertheless, model calculations were done to evaluate this assumption, as well as to investigate the effect of various forms of heterogeneity on the intensity measurements. As shown in Figure 7, the background fluorescence, more specifically, the variance of the background fluorescence, does in fact have a profound effect on the width of the histogram of net brightness measured in images of a population of randomly located virus particles, even though the background is very dim relative to the virions. The *average* magnitude of the background fluorescence relative to the virus particle has only a small influence on the width of the distribution if the background is smooth over distances that are very large compared to the apparent size of the virus (i.e., the size of the PSF). However, spatial *variability* in the background has a dramatic effect, even though the full range of background fluorescence intensities is a fraction of one percent of the virus brightness.

Experience gained with quantitative analysis of virus brightness led to the realization that measurements of virus brightness using the same sample and same microscope varied over time. Likewise, measurements of the same sample on the same day using two different microscopes usually gave quite different results. As one would expect, the primary cause of these differences is the variation over time or between microscopes in the intensity of illumination used to excite fluorescence.

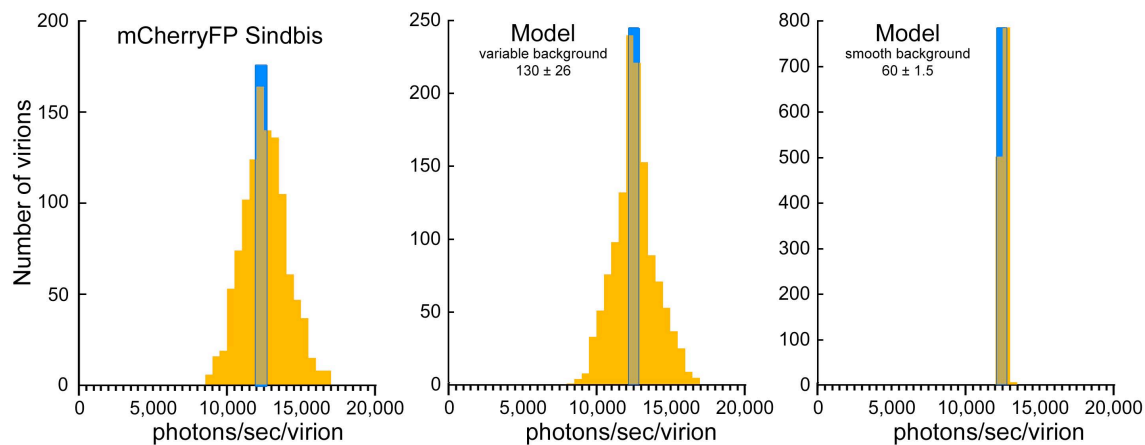

**Figure 7.** Effect of variable background on the distribution of measured brightness in images of a population of identical fluorescent virus particles. *Left*, experimental data; *Middle*, simulation with average background set to 1% and standard deviation of 0.2%, relative to peak virus intensity; *Right*, simulation with average background 0.5%, standard deviation 0.01%. In all three histograms, the expected full width of the distribution based solely on Poisson noise in the fluorescence signal from a virus particle is shown as a blue bar.

A simple way to avoid this problem is provided by the normally stable ratio of quantum yield for fluorescence relative to quantum yields for non-radiative de-excitation pathways for each FP. As long as the ratio of those parameters is constant, then the average number of photons of fluorescence emitted by each FP molecule before it is destroyed by “photobleaching”, or driven into a long-lived dark state, will also be constant. (In what follows, “photobleaching” will be used as a catch-all term for both irreversible light-induced destruction of the fluorophore and light-induced driving of the fluorophore into some dark state from which recovery is very slow compared to the duration of the time-lapse image series used here, which is of the order of 10 sec.) Of course, for any one individual FP molecule, the actual number of photons emitted before “photobleaching” is unpredictable and highly variable, but for an ensemble of 240 molecules, the total number of photons emitted before, say, half of them become dark has a narrow distribution. The mean value of that distribution would be expected to be independent of illumination intensity. Higher intensity bleaches or drives molecules into a dark state faster, but in exact proportion it also generates fluorescent photons at a higher rate. Decreasing the intensity likewise decreases “photobleaching” rate and photon emission rate by exactly the same factor. This reciprocity suggests a more reproducible assay for FP brightness: total photons detected during a series of exposures that results cumulatively in a decrease of intensity to 50% of its initial value, a quantity that will be denoted “Half-Yield” (*HY*). Figure 8 gives an example of the insensitivity of *HY* to changes in illumination intensity. As will be shown below, the use of *HY* as a measure of brightness does not completely evade all of the potential non-linearities in the photophysics/photochemistry of FP, but it is probably the best measure available for use in counting molecules.

*HY* can be measured directly by summing the net intensities in sequential images of a virus particle or organelle until its intensity falls to half of its initial value. A less noisy estimate of *HY* can also be obtained using the ratio of two derived parameters, the initial intensity and the rate constant for “photobleaching”. The expected value of *HY* is obtained by integrating the exponential decay equation, where  $I_0$  is the initial intensity and  $k$  is the exponential decay constant:

$$HY = \int_{t=0}^{t_{1/2}} I_0 e^{-kt} dt = \frac{I_0}{2k}$$

The standard deviation of this estimated sum is related to the standard deviation of  $I_0$  and  $k$  by:

$$sd_{HY} = \sqrt{\frac{\left( (k \cdot sd_{I_0})^2 + (I_0 \cdot sd_k)^2 \right)}{4k^4}}$$

Logarithmic transformation of the equation describing exponential decay of net intensity ( $I$ ) gives:

$$\ln(I_t) = \ln(I_0) - k \cdot t$$

Substituting  $y$  for  $\ln(I)$ , and  $x$  for  $t$ , the equation above is put in the standard linear form  $y = ax + b$ . Estimates of the initial intensity and “photobleaching” rate constant are obtained from weighted least squares fitting of a straight line to this transformed equation. The experimentally measured intensities are known with unequal precision, and should thus be weighted differently when used to estimate the parameters  $k$  and  $I_0$ . If the intensities are expressed in photons or photons/sec, and assuming Poisson statistics, the variance of  $\ln(I)$  is  $1/I$ , so the appropriate weighting factor ( $w$ ) is simply  $I$ . With those substitutions and weights, the weighted least squares estimates of the parameters  $k$  and  $I_0$  are given by (Taylor, 1982; Steel et al., 1997):

$$k = \frac{(\sum wx)(\sum wy) - (\sum wxy)(\sum w)}{(\sum wx^2)(\sum w) - (\sum wx)^2} \quad \ln(I_0) = \frac{(\sum wx)(\sum wxy) - (\sum wy)(\sum wx^2)}{(\sum wx)^2 - (\sum wx^2)(\sum w)}$$

with standard deviations:

$$sd_{I_0} = \sqrt{\frac{(\sum wx^2) \cdot I_0^2}{(\sum wx^2)(\sum w) - (\sum wx)^2}} \quad sd_k = \sqrt{\frac{\sum w}{(\sum wx^2)(\sum w) - (\sum wx)^2}}$$

“Photobleaching” curves for many of the fluorescent proteins are not characterized completely by a single exponential over the entire decay. A typical pattern is a small initial rapid drop in intensity of ~10%, followed by single exponential decay to < 50% of the initial intensity, and then by decay that is slightly slower than predicted by the middle portion of the curve. The first two phases, initial rapid drop followed by single exponential decay, are clearly shown in Figure 8E. This behavior is accurately simulated by a 4-state model comprising the normal ground state G0, the excited singlet state S1, and two non-fluorescent dark states, D1 (singlet; accessible from S1 via a first-order transition) and D0

(ground state; accessible from D1 via a first-order transition) (Dean et al., 2011). Both S1 and D1 are subject to “photobleaching”. The rate of the transition from D0 to G0 is slower than the excitation rate of G0 to S1 achieved in a wide-field microscope. The initial rapid drop in brightness corresponds to the depletion of G0 and pile-up of a substantial fraction of the molecules in D0, after which the steady-state rate of “photobleaching” is maintained. For the purpose of counting molecules, the practical consequence of complications in photochemical behavior is that estimation of the “photobleaching” rate constants needs to be done using only the single-exponential phase of the decay data.

Assayed in this way, by combining the least squares estimates of initial intensity and “photobleaching” rate, measurements of virus brightness in the form of *HY* become more reproducible. That reproducibility enabled a systematic characterization of the long term stability of the Sindbis viruses, as well as the brightness under diverse conditions relevant to their use as calibration standards for counting molecules in cells. Table I gives a summary of measurements made over extended periods and in radically different conditions. The second of the two measurements for Cerulean3FP Sindbis was made on the same preparation of virus after it had been stored in buffer at 4°C for four months, showing that the virus particles are quite stable. Measurements on mCherry Sindbis show that the virions remain brightly fluorescent after formaldehyde fixation or embedding in antifade, even embedding in a transparent epoxy resin (Epotek® optical cement).

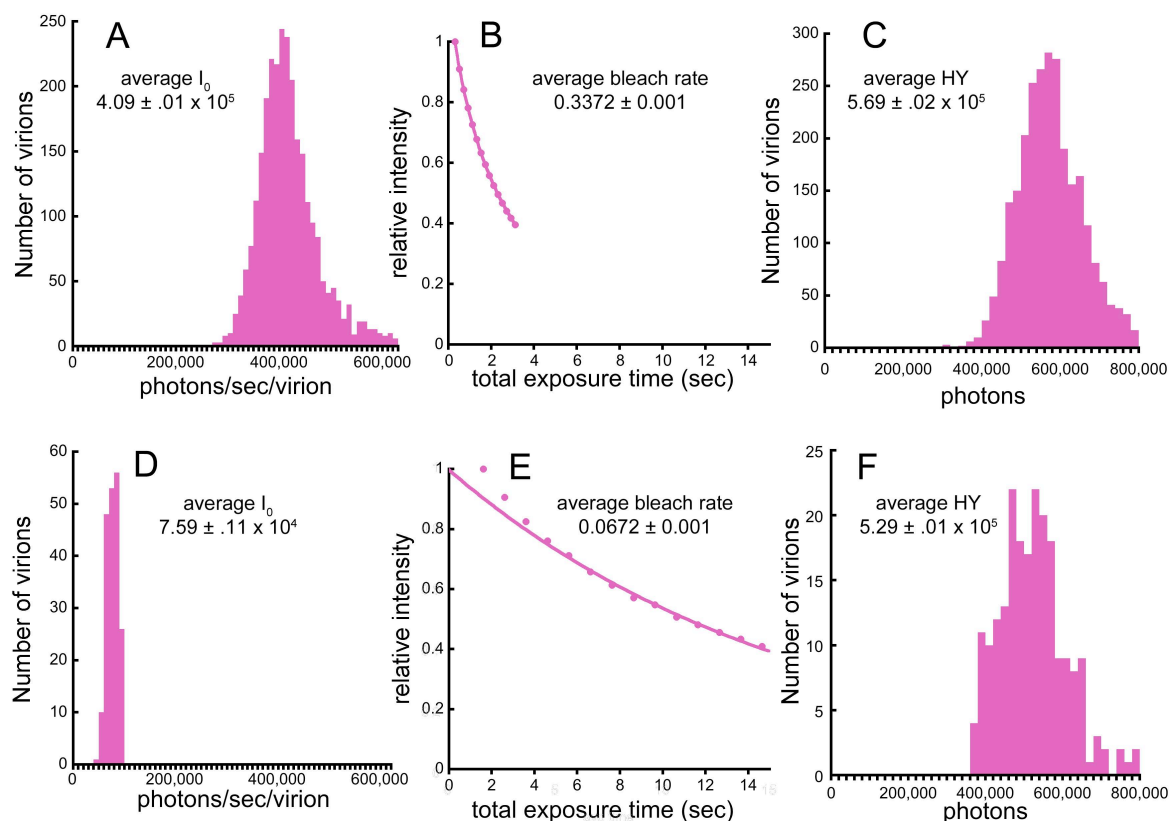

**Figure 8.** Effect of excitation irradiance on the initial brightness, “photobleaching” rate, and *HY*. (A-C) Illumination intensity ~150 watt/cm²; (D-F) Illumination intensity ~25 watt/cm². In (B) and (E), the smooth lines are least squares fits to the exponential decay. Initial intensity and bleach rate are increased by ~5-fold at the higher irradiance, but the total number of photons collected (*HY*) changes by less than 10%.

Although **HY** is ideally completely independent of illumination intensity and is in practice often nearly so (Figure 8), under some conditions this is not the case. An example is given for mCherry Sindbis virions in Table I, where reducing the excitation intensity via a neutral density filter with 32% transmittance, or by using an excitation bandpass filter with wavelength slightly shifted from the optimum for mCherryFP, increases **HY** by 20-30%. The magnitude of this effect is variable with different buffer compositions in the mounting medium. The effect can be explained and quantitatively modeled as a manifestation of the long-lived dark state previously described for several fluorescent proteins (Sinnecker et al., 2005; Day and Davidson, 2014). Note that this behavior is *not* predicted by the simple four-state model (Dean et al., 2011) mentioned above. To explain this effect of illumination intensity, the model must include a transition to a dark state with a rate that is independent of illumination intensity (i.e., not proportional to  $S_1$ ). Fortunately, as shown below, the **HY** for FP in Sindbis virions and in cellular organelles are equally affected by this long-lived dark state, so the virions remain useful calibration standards as long as the measurements are done with the same illumination conditions.

Note that any parameter affecting the *efficiency* with which fluorescence emission is detected does have an easily measurable effect on **HY**. For instance, spherical aberration, which smears the image of the fluorescent object along the optical axis, or use of a lower NA objective, which collects a smaller fraction of the emitted fluorescence, both decrease **HY**. Again this would not affect the estimate of the number of FP molecules in the unknown sample if both virions and cellular sample were imaged under the same conditions. Two examples of counting molecules by this method within organelles of the human parasite *Toxoplasma gondii* are described in detail below.

This sensitivity of **HY** to detection efficiency means that a measurement of the value of **HY** for a particular fluorescent Sindbis virus is an excellent means of quickly comparing the relative efficiency of fluorescent microscope systems, similar to but considerably more convenient than the measure reported earlier (Murray et al., 2007).

#### *Counting molecules of a tubulin-binding protein in a tubulin-based macromolecular assembly.*

The human pathogen *Toxoplasma gondii* is an obligate intracellular parasite and, like the other members of the Phylum Apicomplexa, contains several specialized organelles that are used for invading host cells. One of these organelles is a cone-shaped assembly, the “conoid”, which is built around 14 spirally arranged fibers that are non-tubular polymers of tubulin, a ubiquitous cytoskeletal protein (Figure 9). The tubulin used to make the conoid fibers also make canonical (hollow tubes) microtubules elsewhere in the same cell. The special arrangement of tubulin in the conoid is dictated by non-tubulin components. TgDCX is one such component (Nagayasu et al., 2006). Loss of TgDCX radically disrupts the structure of the conoid and severely impairs invasion of host cells by the parasite. The non-tubular polymeric form of tubulin found in the conoid is not found in the host cell, suggesting that TgDCX may be an attractive target for new parasite-specific chemotherapeutic agents. Thus in addition to its intrinsic interest as a building block of a stunning piece of cellular architecture, TgDCX and its role in conoid assembly are worthy of study from a clinical standpoint. It would be particularly useful to know the stoichiometry of TgDCX relative to tubulin, so that one could begin to formulate concrete models for how the conoid is constructed.

A *Toxoplasma* clone was constructed in which the endogenous TgDCX gene had been replaced with DNA coding for a mCherryFP-TgDCX fusion protein by homologous recombination. Figure 10 shows wide-field and structured illumination microscopy (SIM) images of the homologous recombinant parasites. The parasites are a clone (i.e., all the parasite cells are identical), and their



genome contains the FP-tagged copy of TgDCX only. Thus every molecule of TgDCX in every cell is fused to one mCherryFP molecule. The mCherryFP fluorescence is restricted to the conoid region of the parasite. The results from using measurements of mCherryFP fluorescence to count the number of TgDCX molecules in the conoid have been previously reported (Nagayasu et al., 2016), but the methodological details and solutions to problems encountered in that counting are instructive and are detailed here.

Three different *Toxoplasma* clones were constructed, utilizing mCherryFP-TgDCX, or TgDCX-mCherryFP, or TgDCX-mNeonGreenFP to replace the endogenous TgDCX. The results of measurements (s.e.m.) of fluorescence “photobleaching” on cells of these three clones and on the corresponding fluorescent Sindbis virions are listed in Table II. The derived estimates for the number of TgDCX molecules in the conoid of the mCherryFP-TgDCX and TgDCX-mNeonGreenFP clones are similar ( $3573 \pm 105$  and  $3053 \pm 97$ ), but the number derived from the TgDCX-mCherryFP clone is quite different ( $1894 \pm 52$ ).

| Sindbis virus FP | $I_0$<br>10 <sup>3</sup> photons/<br>sec/virion | $k * 100$<br>(sec <sup>-1</sup> ) | HY<br>(10 <sup>5</sup><br>photons) | conditions              | N    |
|------------------|-------------------------------------------------|-----------------------------------|------------------------------------|-------------------------|------|
| mApple           | 19.5 (0.01)                                     | 4.22 (0.02)                       | 2.18 (0.01)                        |                         | 2523 |
| mCerulean3       | 8.22 (0.08)                                     | 2.87 (0.03)                       | 1.35 (0.02)                        |                         | 246  |
| mCerulean3       | 8.55 (0.07)                                     | 4.26 (0.03)                       | 1.05 (0.01)                        | 4 months at 4°C         | 1024 |
| mEGFP (L221K)    | 18.3 (0.20)                                     | 1.44 (0.01)                       | 6.41 (0.08)                        |                         | 1319 |
| mEmerald         | 26.8 (0.01)                                     | 5.61 (0.02)                       | 2.24 (0.01)                        |                         | 1654 |
| mNeonGreen       | 29.5 (0.23)                                     | 1.56 (0.01)                       | 9.75 (0.06)                        |                         | 298  |
| mVenus           | 26.9 (0.01)                                     | 5.31 (0.02)                       | 2.37 (0.01)                        |                         | 2289 |
| mCherry          | 19.4 (0.06)                                     | 3.2 (0.01)                        | 3.17 (0.01)                        | ex 572/35 em 632/60     | 2880 |
| mCherry          | 7.57 (0.04)                                     | 0.81 (0.003)                      | 4.45 (0.02)                        | 32%T                    | 3014 |
| mCherry          | 12.6 (0.06)                                     | 2.86 (0.01)                       | 2.09 (0.01)                        | spherical aberration    | 3396 |
| mCherry          | 9.58 (0.04)                                     | 1.24 (0.004)                      | 3.67 (0.02)                        | ex 555/28 em 617/73     | 2046 |
| mCherry          | 14.7 (0.08)                                     | 2.78 (0.01)                       | 2.48 (0.01)                        | water lens NA 1.2       | 2593 |
| mCherry          | 292 (0.62)                                      | 39.1 (0.08)                       | 3.49 (0.01)                        | CH <sub>2</sub> O fixed | 3512 |
| mCherry          | 169 (0.55)                                      | 17.8 (0.09)                       | 4.60 (0.03)                        | in optical cement       | 1850 |
| mCherry          | 210 (0.54)                                      | 31.6 (0.12)                       | 3.16 (0.01)                        | in ProLong® antifade    | 1842 |

**Table I.** Initial brightness, “photobleaching” rate, and Half-Yield for fluorescent Sindbis virions under various conditions. The values are listed as mean (s.e.m.). The data were acquired on different fluorescent microscopes over a period of 12 months, except for the values for mCherryFP Sindbis in the grey shaded area, which were all acquired from the same slide on the same day. A silicone immersion lens 60X NA1.3 with correction collar set to minimize spherical aberration was used except as indicated. For one of the mCherryFP Sindbis datasets, the correction collar was deliberately misadjusted to show the effect of spherical aberration, and for another, a water immersion lens 60X NA1.2 was used.

**Figure 9.** Drawings and EM images of *Toxoplasma gondii* showing various features mentioned in the text. Drawings modified from (Liu et al., 2016). Lower left EM image by Dr. Naomi Morrisette (Morrisette et al., 1997). The small inset EM images show two of the tubulin-containing polymers in *T. gondii*, including the inverted-"J"-shaped conoid fibers that contain TgDCX. The conoid extends and retracts through the apical polar ring as shown, in response to changing  $[Ca^{2+}]$ . The apical polar ring contains the protein TgAPR1.

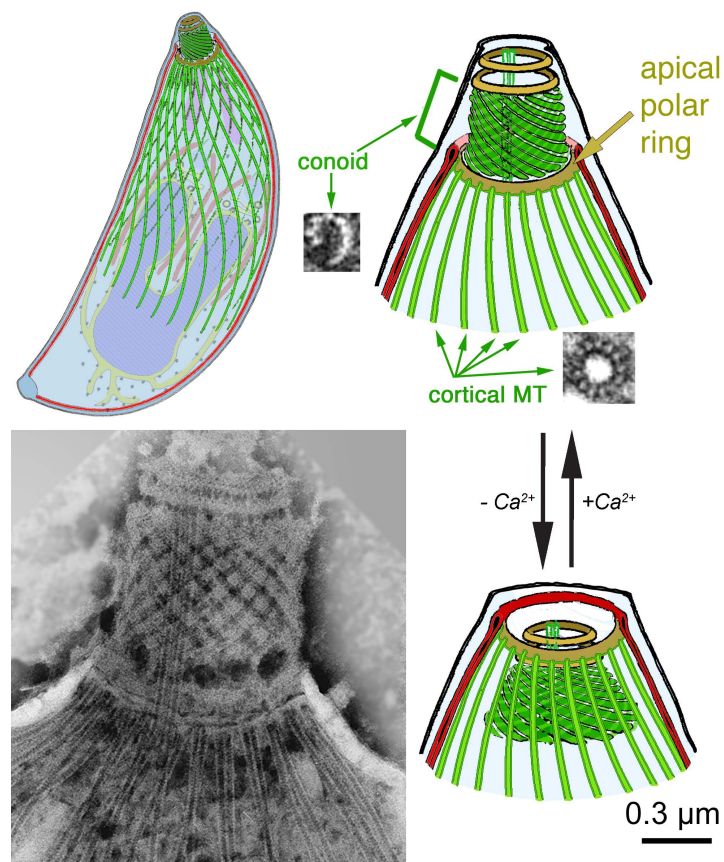

|                      | $I_0$<br>(photons/<br>sec) | bleach rate<br>(sec <sup>-1</sup> ) | $HY$<br>(photons)         | N    | number of<br>FP<br>molecules |
|----------------------|----------------------------|-------------------------------------|---------------------------|------|------------------------------|
| mCherryFP-TgDCX      | 295,000 (4400)             | 0.030 (0.001)                       | $4.72 (0.14) \times 10^6$ | 208  | 3573 (105)                   |
| TgDCX-mCherryFP      | 91,000 (2300)              | 0.020 (0.001)                       | $2.40 (0.07) \times 10^6$ | 98   | 1894 (52)                    |
| TgDCX-mNeonGreenFP   | 192,000 (6200)             | 0.008 (0.003)                       | $1.24 (0.04) \times 10^7$ | 108  | 3053 (97)                    |
| mCherryFP Sindbis    | 19,400 (60)                | 0.032 (0.001)                       | $3.17 (0.01) \times 10^5$ | 2880 | 240                          |
| mNeonGreenFP Sindbis | 29,500 (230)               | 0.016 (0.001)                       | $9.75 (0.06) \times 10^5$ | 1118 | 240                          |

Table II. Data for counting TgDCX molecules in *T. gondii*.

One possibility is that the discrepancy reflects a real difference in the number of molecules of TgDCX in the conoids of clones expressing mCherryFP fused to the N-terminus versus the C-terminus. However, from a biological standpoint, a difference among the three clones in their conoid content of TgDCX seems unlikely. In the absence of TgDCX the structure of the conoid is severely disrupted and the rate of growth is severely impaired. In the three knock-in clones, the rate of growth in culture is normal, suggesting that the number of molecules of FP-tagged TgDCX in the conoids of knock-in

clones is the same as TgDCX in wild-type. In the knock-in clones, the FP-tagged TgDCX is the only copy of TgDCX in the genome.

Alternatively, the discrepancy in estimated number of TgDCX molecules per conoid might arise from some difference in the photophysical properties of mCherryFP in the conoid when fused to the N-terminus of TgDCX versus the C-terminus of TgDCX — different extinction coefficient ( $\epsilon$ ), quantum yield for fluorescence ( $\Phi_F$ ), or quantum yield for “photobleaching” ( $\Phi_B$ ). It would be difficult to measure directly any of those fundamental photophysical parameters individually for mCherryFP in the conoid, but the parameters  $HY$ ,  $I_0$ , and  $k$ , which I have measured, are linearly related to combinations of  $\epsilon$ ,  $\Phi_F$ , and  $\Phi_B$ . In each case, the proportionality constant includes the excitation photon flux.

$$HY \sim \frac{\phi_F}{\phi_B} \qquad I_0 \sim \epsilon \phi_F \qquad k \sim \epsilon \phi_B$$

$HY$  should be unaffected by changes in the extinction coefficient. Therefore a difference in  $HY$  between mCherryFP fused to the N-terminus of TgDCX versus the C-terminus of TgDCX means that the ratio of the quantum yields for fluorescence and “photobleaching” must be different for those two fusion proteins. Because both  $I_0$  and  $k$  are also different for the two (Table II), it seems probable that  $\Phi_F$  and  $\Phi_B$  must both change when mCherryFP is switched from N- to C-terminus. (The measurements for the two clones were made under identical illumination conditions.) Other observations (see below) also suggest that  $\Phi_F$  and  $\Phi_B$  are sensitive to their local environment. With this sensitivity in mind, it seems prudent to ensure that “photobleaching” rates measured for the FP are the same for the virion and the cellular organelle before using the fluorescent virus as a calibration.

### *Counting molecules of a protein component of a putative microtubule organizing center.*

The apical polar ring, from which the 22 cortical microtubules (MTs) of *T. gondii* originate, is a distinguishing feature of all apicomplexans (Morrisette and Sibley, 2002) and is hypothesized to be the primary MT organizing center for the *Toxoplasma* cytoskeleton (Russell and Burns, 1984). TgAPR1, a 460 aa protein, has been identified as a component of the apical polar ring (Zhang et al., 2007). A clone of knock-in parasites was constructed in which the single genomic copy of TgAPR1 was replaced with TgAPR1-mCherryFP (Figure 11) by homologous recombination (Wu et al., 2016).

“Photobleaching” of the fluorescent ring structure in the knock-in parasites was measured along with mCherryFP-Sindbis virus under the same conditions. From the  $HY$  of the ring structure and the virus ( $1.84 \pm 0.06 \times 10^6$  and  $3.17 \pm 0.01 \times 10^5$  photons respectively), the number of TgAPR1 molecules in the ring was calculated to be  $1393 \pm 44$ . As described above for the Sindbis virus, the  $HY$  for the ring structure was found to change with intensity of illumination. Using a neutral density filter with 32% transmittance to attenuate the excitation,  $HY$  increased to  $2.53 \pm 0.11 \times 10^6$  for the ring structure and  $4.45 \pm 0.02 \times 10^5$  for the virus. However, the number of molecules of TgAPR1 in the ring calculated from the ratio of the two  $HY$  at the weaker illumination condition is the same ( $1364 \pm 60$ ).

An interesting phenomenon was observed with this parasite line when “photobleaching” measurements were carried out on the parasites outside their host cell. In this situation, two distinct



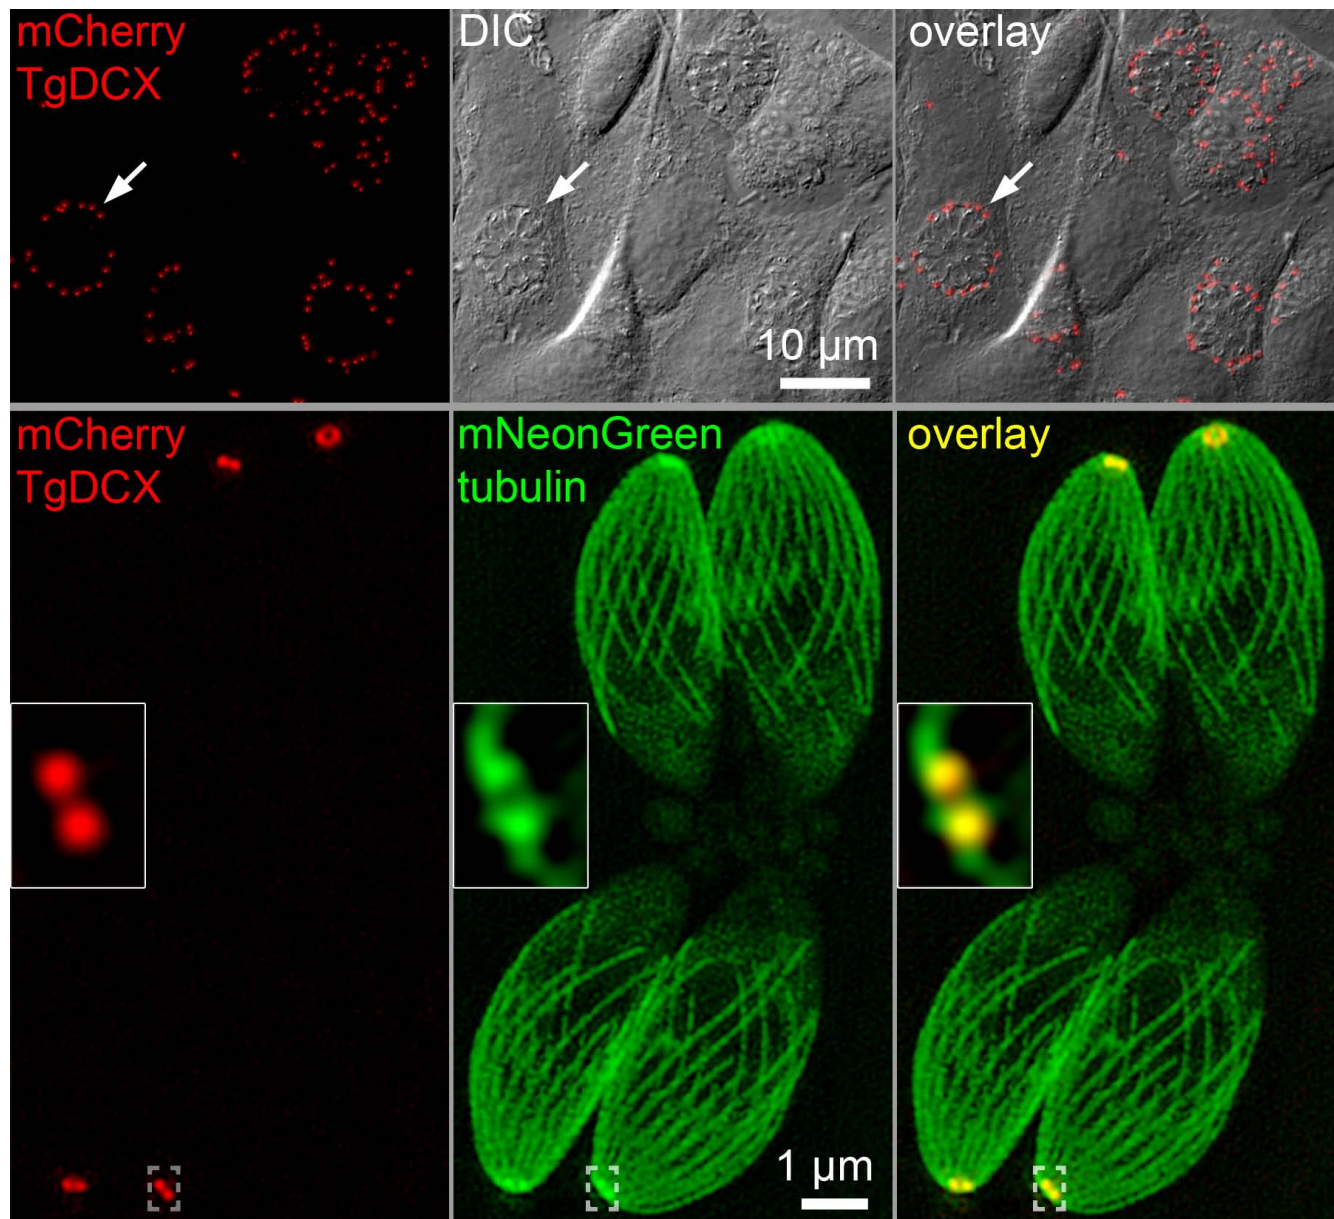

**Figure 10.** Wide-field epifluorescence, DIC, and SIM images of *T. gondii*. (*upper row*) A monolayer culture of fibroblasts infected with recombinant parasites in which the TgDCX gene has been replaced with DNA coding for an mCherryFP-TgDCX fusion protein. *T. gondii* is an obligate intracellular parasite and the parasites live in a vacuole in the host cell. The white arrow points to a vacuole containing 16 parasites, each of which has one spot of mCherryFP fluorescence at its apical end. The field of view includes four 16-parasite vacuoles plus a few other smaller ones. (*lower row*) SIM images of four mCherryFP-TgDCX knock-in parasites which are also expressing mNeonGreenFP- $\beta$ 1-tubulin. mNeonGreenFP fluorescence is seen in both the cortical microtubules and conoid, which is retracted as usual in these intracellular parasites (cf Figure 9). mCherry fluorescence is restricted to the conoid. The insets show a 4X enlargement of the conoid region of one parasite, as marked by the dashed brackets. In these images, the contrast of the red and green channels has been adjusted independently so that both will be visible in the overlays.

“photobleaching” behaviors were observed. In almost all (~90%) of these extracellular parasites, the TgAPR1-mCherryFP fluorescence decayed much faster, ~10-fold faster, than it did in parasites located within the host cell. Intermingled among this majority population were other parasites, about 10% of the total, whose TgAPR1-mCherryFP fluorescence decayed at about the same rate as all intracellular

parasites, which was the same as the mCherryFP-Sindbis virus. Close inspection of DIC images of the extracellular parasites revealed that the 10% were lysed, as judged by the presence of Brownian motion of small particles in the cytoplasm. The fluorescence of the fast-fading population recovered substantially over a period of 10-20 minutes. Recovery of the slow-fading population was less complete.

Presumably the difference between the lysed and intact extracellular parasites is related to some metabolism-dependent change in the parasites when they are outside the host, and thus deprived of nutrients or some other protective factors their host-cell would normally provide. A few experiments were undertaken to confirm that the external chemical environment could significantly affect the rate of loss of mCherryFP fluorescence in the parasites. Adding 20  $\mu$ M methylene blue, which generates reactive oxygen species when illuminated, to the culture medium in which the extracellular parasites were suspended, eliminated the difference between the two populations. In the presence of methylene blue, TgAPR1-mCherryFP fluorescence decayed at a fast rate, in all parasites, lysed or intact, and showed significant recovery after 10-20 minutes. On the other hand, scavengers of oxygen (glucose plus glucose oxidase plus catalase) or superoxide (ascorbic acid plus superoxide dismutase) had little effect on the rate of fading of either the fast or slow population.

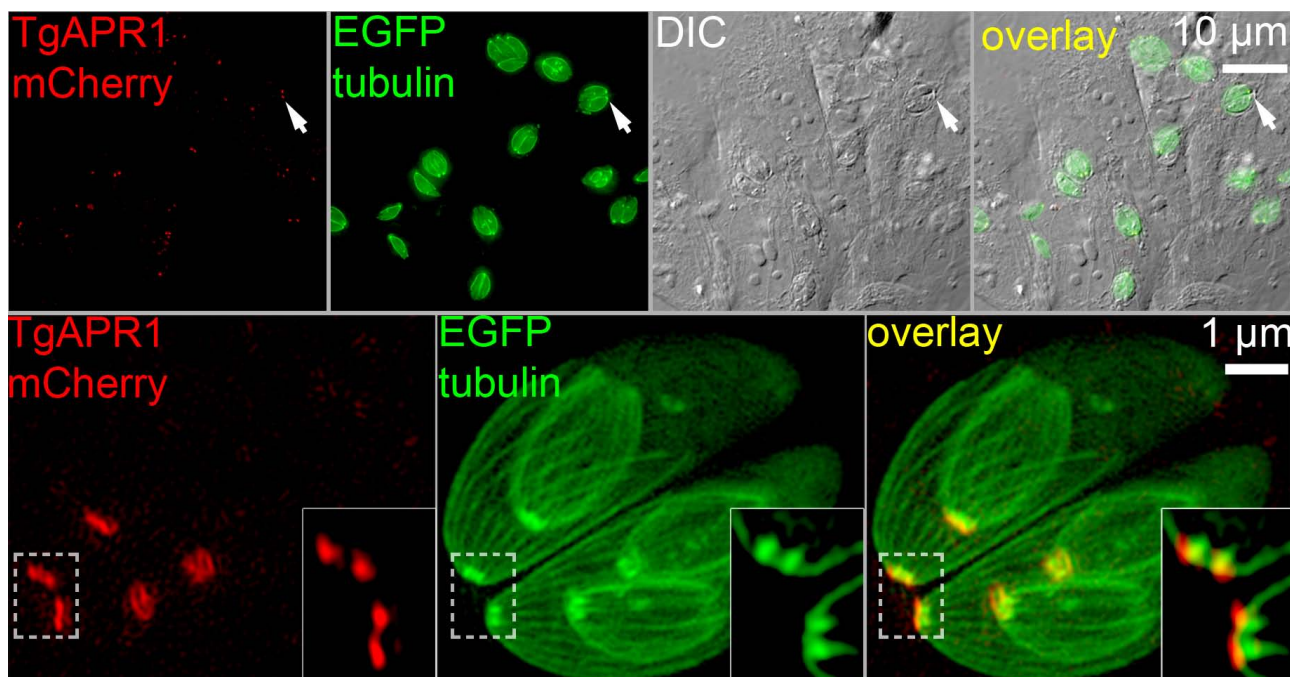

**Figure 11.** Wide-field epifluorescence, DIC, and SIM images of *T. gondii*. (upper row) A monolayer culture of fibroblasts infected with recombinant parasites in which the TgAPR1 gene has been replaced with DNA coding for a TgAPR1-mCherryFP fusion protein. The parasites also contain an extra copy of the gene for  $\beta$ 1-tubulin, fused to EGFP. The white arrows point to one of the many vacuoles containing 2 parasites. (lower row) SIM images of TgAPR1-mCherryFP knock-in parasites which are also expressing EGFP- $\beta$ -tubulin. EGFP fluorescence is seen in both the cortical microtubules and the conoid, which is retracted in these parasites. mCherryFP fluorescence is restricted to the apical polar ring, which lies adjacent to the bright spot of EGFP tubulin in the conoid (cf Figures 9 and 10). The insets show a 4X enlargement of the apical polar ring regions of two parasites, as marked by the dashed white border. In these images, the contrast of the red and green channels has been adjusted independently so that both are visible in the overlays.



## Methods

### *Plasmid construction*

#### *TE12-mCherryFP*

A plasmid (TE12) encoding the complete genome of recombinant Sindbis virus (Lustig et al., 1988) was kindly provided by Dr. Suchetana Mukhopadhyay (Indiana University, Bloomington). From TE12 a 3462 bp region coding for proteins C, E3, E2, 6K, and part of E1 was removed with BsiWI and HpaI. The gap was filled with a 4206 bp piece containing the same coding sequences plus mCherryFP fused in-frame between E3 and E2. Overlap PCR from three fragments was used to produce the 4206 bp piece. The templates used for PCR, the primers, and the lengths of the three fragments are: Fragment #1 (1758 bp) amplified from the TE12 plasmid, position 6910-8634; primers S1 and AS2 (Table III). Fragment #2 (785 bp), from a mCherryFP coding sequence (synthesized with silent mutagenesis to remove multiple restriction sites); primers S2 and AS5. Fragment #3 (1804 bp), from TE12 position 8629-10396; primers S5 and AS7. The three purified fragments were mixed and ligated by PCR with primers S1 and AS7. The 4206 bp product, cut with BsiWI and HpaI, was ligated into the cut TE12 vector. The furin recognition site at the C-terminus of E3 (SGRSKR) is intact in the expressed protein product. Before cleavage by furin, the N-terminus of mCherryFP is separated from the furin cleavage site by a 5 aa flexible linker GAPGSA. The C-terminus of mCherryFP is coupled to the N-terminus of E2 via the 6 aa linker AAAGSG.

#### *TE12-mAppleFP, TE12-mEmeraldFP, TE12-mNeonGreenFP, TE12-mVenusFP*

These three were prepared in the same way. In each case, fragment #2 for the overlap PCR was obtained by amplifying the corresponding FP coding sequence with primers S2 and AS5. The plasmid template for mNeonGreenFP (Shaner et al., 2013) was kindly provided by Dr. Richard Day (Indiana University School of Medicine, Indianapolis).

#### *TE12-EGFP*

The region of TE12 coding for proteins C, E3, E2, 6K, and part of E1 (3267 bp) TE12 was excised with BsiWI and BspQI and replaced with a 4020 bp piece containing the same coding sequences plus EGFP fused in frame between E3 and E2. The 4020 bp piece was produced by overlap PCR from three fragments. Fragment #1 (1758 bp), from TE12, position 6910-8630; primers S1 and AS2 (Table III). Fragment #2 (794 bp), from an EGFP-containing plasmid; primers S2 and AS4. Fragment #3 (1804 bp), from TE12 position 8631-10396; primers S4 and AS7. These three fragments were purified, mixed, and used as template for PCR with primers S1 and AS7.

#### *TE12-mCerulean3FP*

A 2244 bp region of plasmid TE12 coding for proteins C, E3, and part of E2 was removed by cutting with BclI and BspQI, and replaced with a 2997 bp piece containing the same coding sequences plus mCerulean3FP fused in frame between E3 and E2. The 2997 bp piece was produced by overlap PCR from three fragments. Fragment #1 (1758 bp) was amplified from TE12 position 6910-8630 with primers S1 and AS2 (Table III). Fragment #2 (794 bp) was amplified from plasmid pmCerulean3FP-N1 ((Markwardt et al., 2011) kindly provided by Dr. Richard Day) with primers S2 and AS3. Fragment #3 (1804 bp) was amplified from TE12 position 8631-10396 with primers S3 and AS6. These three fragments were purified, mixed, and used as template for PCR with primers S1 and AS6.

### *TE12-tdTomatoFP*

The EGFP CDS of TE12-EGFP was removed with enzymes *AscI* and *FseI*, and replaced with sequences coding for tdTomatoFP, prepared by PCR amplification with primers S2 and AS4. The linker between the C-terminus of E3 and N-terminus of the FP, which includes an *AscI* site, codes for the amino acid sequence GAPGSA. Between the C-terminus of the FP and N-terminus of E2, the linker codes for the amino acid sequence AGPGSG and includes an *FseI* site.

### *TE12-mEGFP(L221K)*

A 4215 bp region of plasmid TE12-mVenusFP was removed by cutting with *BsiWI* and *HpaI*, and replaced with a 4020 bp piece containing the same coding sequences with mEGFP(L221K) instead of mVenusFP fused in frame between E3 and E2. The 4020 bp piece was produced by overlap PCR from three fragments. Fragment #1 (1758 bp) was amplified from TE12-mCherryFP position 6910-8667 with primers S1 and AS2 (Table III). Fragment #2 (794 bp) was amplified from an mEGFP(L221K)-containing plasmid (Addgene #21042) with primers S2 and AS5. Fragment #3 (1804 bp) was amplified from TE12-mCherryFP position 9366-11140 with primers S5 and AS7. These three fragments were purified, mixed, and used as template for PCR with primers S1 and AS7. In TE12-mEGFP(L221K) the E3-FP linker is GAPGSA and the FP-E2 linker codes for AAAGSG and includes a *NotI* site.

| name | sequence                                                     | RE site |
|------|--------------------------------------------------------------|---------|
| S1   | ctatggcGTTAACcgggtctgatg                                     | HpaI    |
| S2   | cgtctggcagaagcaaaagaGGCGCGCCaggatcagcaatggtgagcaagggcgagg    | AscI    |
| S3   | gcatggacgagctgtacaaGGCCGGCCcaggaagcggaagcgctcactgacgactttacc | FseI    |
| S4   | gcatggacgagctgtacaaGGCCGGCCccggaagcggaagcgctcactgacgactttacc | FseI    |
| S5   | gcatggacgagctgtacaagGCGGCCGCaggaagcggaagcgctcactgacgactttacc | NotI    |
| AS2  | cctcgcccttgctcaccattgctgatcctGGCGCGCCtcttttgcttctgccagacg    | AscI    |
| AS3  | ggtaaagtcgtcagtgacgcttccgcttctgGGCCGGCCttgtacagctcgtccatgc   | FseI    |
| AS4  | ggtaaagtcgtcagtgacgcttccgcttccggGGCCGGCCttgtacagctcgtccatgc  | FseI    |
| AS5  | ggtaaagtcgtcagtgacgcttccgcttctGCGGCCGCttgtacagctcgtccatgc    | NotI    |
| AS6  | cgtcatgtcTGATCAagtccggtga                                    | BclI    |
| AS7  | gacaattcgaCGTACGcctcactc                                     | BsiWI   |

Table III. Primers used in this project. Restriction enzyme recognition sequences are capitalized.

### *In vitro transcription*

Sindbis viral RNA (+)-strand was transcribed *in vitro* from the TE12-FP plasmids with SP6 RNA polymerase (Rice et al., 1987). PvuI-linearized plasmid DNA (100-200 ng) was precipitated with ethanol, re-dissolved in 20 µL of 40 mM TrisCl (pH 7.9 at room temperature), 10 mM MgCl<sub>2</sub>, 2 mM spermidine, 10 mM DTT, 2 mM each of rATP, rCTP, rGTP, and rUTP, 0.5 mM 3'-O-Me-

m<sup>7</sup>G(5')ppp(5')G RNA cap structure analog (New England Biolabs #S1411), 1X RNaseq<sup>TM</sup> reagent (Life Technologies #AM7005), and incubated at 60°C for 10 min. After cooling to room temperature, 20 units of SUPERase<sup>•</sup> In<sup>TM</sup> RNase inhibitor and 20 units of SP6 RNA polymerase (New England Biolabs #M0207) were added, the mixture was incubated at 39°C for 2 hours. The entire reaction mix was immediately used for transfection.

### *RNA transfection and virus production*

Each *in vitro* transcribed RNA was transfected into Vero or BHK-21 cells in a 24-well plate using Effectene (Qiagen #301425) following the manufacturer's protocol, with a total volume of 180 µL of serum free media per well. After overnight incubation at 37°C in a CO<sub>2</sub> incubator, 0.8 mL of culture medium was added and incubation continued for an additional 24 hours. By 6-8 hours after transfection, plaques of virus infected cells were easily visible by fluorescence microscopy using a low power (4x or 10x) objective. 24-48 hours after transfection, the culture supernatant was removed, centrifuged at 16,000 x g for 5 min to remove cell debris, then stored in 0.1 mL aliquots frozen at -80°C. The concentration of infective virus particles was determined by plaque assay (Hernandez et al., 2010).

### *Virus production and purification*

T150-flasks of Vero or BHK-21 cells were incubated with Sindbis-FP virus, ~1 pfu/cell, diluted from frozen stock into a volume of culture medium (DMEM, 2 mM glutamine + 12% (Vero) or 2% (BHK) calf serum (HyClone<sup>TM</sup> Cosmic Calf<sup>TM</sup> Serum, Thermo Scientific #SH30087) just sufficient to cover the cells and rocked at room temperature for 1 hour. 20 mL culture medium was added and the flasks were incubated at 37°C for 48 hr. The culture supernatant was removed, centrifuged at 5000 x g for 20 min, and passed through a 0.22 µm filter. In many cases, this clarified culture supernatant can be used directly as the source of fluorescent virus particles for molecular counting. When further purification was needed (e.g., to reduce background fluorescence), solid NaCl and PEG-8000 (Sigma-Aldrich #P5413) were added to give final concentrations of 1.0 M and 10% (wt/vol), and the mixture was stirred gently at room temperature until the solids were dissolved, then at 4°C overnight. Precipitated virus was collected by centrifugation at 20,000 x g for 30 min. The pellet was gently re-dissolved in 1.2 mL buffer H (50 mM Na-HEPES pH 7.0, 0.1 M NaCl, 0.5 mM Na<sub>2</sub>EDTA) and centrifuged at 16,000 x g for 10 min. The supernatant was removed and saved, and the pellet was extracted with 0.5 mL buffer H and centrifuged at 16,000 x g for 10 min. The combined supernatants were layered over a discontinuous sucrose gradient (1 mL 65% sucrose in buffer H, 2 mL 20% sucrose in buffer H) and centrifuged at 240,000 x g in a Beckman SW55Ti rotor for 45 min. The strongly colored band of purified virus at the 20%-65% sucrose interface was removed with a syringe and 26G needle, diluted 5 fold with buffer H, aliquoted and stored frozen at -80°C.

### *Biological properties and handling of the Sindbis virus standards.*

Sindbis virus is a member of the alphavirus family, which includes some important human pathogens. In the wild, Sindbis itself is an arthropod borne vector spread by mosquitos with a host range spanning birds and mammals, including primates. In humans, particularly in Europe, Africa, the Middle East, and Russia, Sindbis infections are fairly common. Most infections are probably asymptomatic, with the remainder typically involving a self-limited bout of mild fever and arthralgia or skin rash. Human to human transmission does not occur (Schmaljohn and McClain, 1996). Sindbis is categorized as a Risk Group 2 agent and subject to BSL-2 precautions for laboratory work. It is easily

inactivated by common disinfectants, including 70% ethanol and detergents. From the experience of many years of research in many laboratories, the common laboratory strains of Sindbis virus have not proven hazardous to humans. No case of laboratory acquired infection has been reported.

The quantity of Sindbis virus needed for use as a fluorescent standard is minuscule compared to what is readily generated in the laboratory in a single small culture vessel. Viral suspensions can be stored frozen for years, and new preparations made from frozen stock with minimal effort. For long term use, it is best to make a stock and freeze it, removing small aliquots as needed. Repeated serial passage in culture is not recommended, as dark, faster replicating, mutants appear spontaneously and take over the population.

### *Toxoplasma gondii* culture and strain construction.

*T. gondii* tachyzoites were grown in monolayers of human foreskin fibroblast (HFF) cells (Roos et al., 1994), harvested from culture supernatant by centrifugation at 3000 x g for 1 min, passed through a 3 µm Nuclepore filter (Whatman 110612), centrifuged, and resuspended in CO<sub>2</sub> Independent Medium (Gibco 18045–088). Transfection was carried out as previously described (Heaslip et al., 2009).

### Imaging

7 µL of virus culture supernatant or sucrose-gradient purified virus was spread on a cleaned 22x22 mm #1.5 coverslip, allowed to adsorb for 2 min, then placed on a 3 µL droplet of mounting medium (Buffer H unless otherwise specified) on a cleaned glass slide. The edges of the coverslip were sealed with VALAP (Vaseline:Lanolin:Paraffin wax 1:1:1). For some measurements the coverslips were blotted on filter paper and immediately placed on a small droplet of optical cement (Epotek® 305, Epoxy Technology Inc.) and pressed flat, then allowed to harden overnight.

*Toxoplasma* cultures for imaging were grown in 35-mm plastic dishes with #1.5 glass coverslip bottom (MatTek P35G-1.5–10-C). Just before transferring to the microscope, the medium was replaced with CO<sub>2</sub>-independent medium (Gibco 18045–088). A humidified environmental chamber surrounding the microscope stage maintained the sample at 37°C. For imaging of *T. gondii* outside the host cell, a concentrated suspension of parasites was allowed to adhere to a Cell-Tak® (Corning #354240) coated coverslip for 20 min in a humid chamber, rinsed with the buffer to be used as mounting medium, and inverted onto a droplet of the same medium on a slide. The edges of the coverslip were sealed with VALAP.

Images were acquired on four different fluorescence microscope systems (three Olympus, one Nikon), using three different types of light sources, ten different filter sets, four different objective lenses, and three different cameras. The various hardware combinations are summarized in Table IV.

### Image analysis

An updated version of the Semper (Saxton et al., 1979) software package (source code generously provided by Dr. Owen Saxton) running under Linux on a Mac Mini or MacBookPro was used for quantitative image analysis. Non-uniform illumination was corrected by “flatfielding” (i.e., dividing each image by the image of a uniformly fluorescent specimen that had been normalized to 1.0 at its peak), and the region for analysis was restricted to the area of the image whose illumination was at least 85% of the maximum. Using hardware and software built in to the Applied Precision Deltavision system, photosensor measurement of actual illumination intensity during each individual image acquisition was used to globally normalize all images of each FP to a common standard exposure. Single optical sections at optimal focus were used for analysis of the images, but 3D stacks

of 3-5 slices were sometimes used to find the best focal plane. Images intensities in grey-levels were converted to intensities in photons/sec, using an experimentally determined ADU gain calibration (Faruqi et al., 1999; Murray, 2007) together with the known exposure time.

| scope | light source | lenses                                                          | camera                       | ex (mW)                                  |                                                                        | em                                             |
|-------|--------------|-----------------------------------------------------------------|------------------------------|------------------------------------------|------------------------------------------------------------------------|------------------------------------------------|
| D1    | Hg arc       | 60X NA 1.4 oil<br>60X NA 1.3<br>silicone<br>60X NA 1.2<br>water | Photometrics<br>CoolSnap HQ  | cyan<br>green<br>yellow<br>orange<br>red | 436/10 (1.0)<br>470/40 (1.6)<br>500/20<br>555/28 (6.6)<br>572/35 (9.8) | 525/36<br>525/50<br>580/70<br>605/52<br>632/60 |
| D2    | Xenon<br>arc | 60X NA 1.4 oil                                                  | Photometrics<br>CoolSnap HQ2 | green<br>orange                          | 490/20 (0.9)<br>555/28 (1.6)                                           | 528/38<br>617/73                               |
| D3    | LEDs         | 60X NA 1.4 oil<br>60X NA 1.3<br>silicone                        | Photometrics<br>CoolSnap HQ2 | green<br>red                             | 475/28 (34.8)<br>575/25 (61.9)                                         | 523/36<br>632/60                               |
| N1    | LEDs         | 60X NA 1.4 oil                                                  | Hamamatsu<br>Orca Flash 2.8  | green<br>orange<br>red                   | 475/28<br>542/27<br>575/25                                             | 525/50<br>593/46<br>615/24                     |

Table IV. Microscope light sources, lenses, cameras, and filters. D1-3 are different Olympus microscopes associated with different DeltaVision systems. N1 is a Nikon microscope.

The most troublesome problem to be solved in making quantitative measurements of fluorescence proved to be making an accurate estimate of local background intensity. Many different protocols were tried before settling on the following as the most reliable for these particular images. The images considered here are characterized by well-defined small peaks of intensity (virus particles, PSF size) surrounded by large areas of much lower intensity (background). For each image, a local background was defined as the mode of the population of intensities in small neighborhoods (typically 0.1% of the area of the full-size image). A full-size background image was then created by bilinear interpolation between the array of local modes.

Images of fluorescent virus normally included ~500 virions per field of view. Standard particle analysis algorithms in Semper were efficient at automatic identification of virus particles. The automatic particle recognition algorithm identified patches of intensity satisfying four selection criteria: (1), a contiguous set of pixels with minimum intensity exceeding the local background by a certain threshold, usually taken as ten times the expected standard deviation of the average background assuming Poisson statistics, and maximum intensity less than four times the predetermined typical peak intensity of a single virus particle; (2) the area of the patch was required to lie between a minimum (one-half of the PSF area) and maximum (three times the PSF area) size; (3) the patch contained no holes; and (4) the circularity of the patch (defined as area multiplied by  $4\pi$  and divided by perimeter-squared) exceeded 0.7. The locations of the centers of mass of the identified particles were computed, and the intensities of all pixels within an area equal to twice the area of the PSF (calculated for the objective lens and emission wavelength of the FP) centered on that location were summed. The local background intensity multiplied by the number of pixels within the area of summation was subtracted to give the net intensity for each virus particle.



Images of organelles within *Toxoplasma* contained at most a few dozen organelles per field of view. For this small number, and due to the more variable background, it was simpler to identify organelles manually on the display. Subsequent processing, including the estimation of local background, was the same as for the virus particles. The area of summation was set individually for each manually identified organelle by using the cursor to define the major and minor semi-axes of an elliptical ROI. Frequently the images of two organelles belonging to two closely adjacent *Toxoplasma* overlapped, but this situation was readily recognized from the DIC image that was taken along with every fluorescent image, so the net intensity could be reliably annotated as arising from one or two organelles. Using the fluorescence/DIC overlay image it was also easily possible to distinguish daughter organelles from those of the mature adult cells.

### *Modeling of fluorescent virion images and noise analysis*

Simulated images of fluorescent virus particles were created as test objects to validate the image analysis programs and to analyze quantitatively the contributions of various sources of noise. Each digital test object was the sum of three components: camera offset plus read-out noise, background fluorescence, and virus particles.

Camera offset was a constant value. Camera read-out noise was modeled as a Gaussian distribution with a mean of zero and a standard deviation of 8, which is the experimentally measured value for the camera used for most of the experiments. A 2D array of offset plus read-out noise was created.

Background fluorescence was modeled as the sum of a constant baseline intensity plus a spatially varying but temporally constant component whose amplitude relative to the baseline could be set as a parameter in the program. A 2D array was created, apodized according to the non-uniform illumination function (see below), and Poisson noise corresponding to the mean background intensity was added.

Virus particles were modeled as delta functions. The possibility of intrinsic heterogeneity in the virus particles was allowed for in two ways. First, the magnitude of each delta function was chosen by random drawing from a population with Gaussian distributed magnitudes. The standard deviation of the Gaussian distribution was set as a parameter in the program. Second, each virus particle was assigned its individual photobleaching rate constant, again drawn randomly from a Gaussian distributed population of rate constants with standard deviation as a program parameter.

A series of simulated images modeling successive time-points in a bleach series was created from these three components as follows. First, a fixed number of virus particles (typically 250 to 1000) was distributed randomly over a 2D space. In successive images (i.e., successive time points in the bleach series), the locations of the virus particles were unchanged, but the magnitude of each delta function in the 2D array was decremented exponentially according to its individual photobleaching rate constant. Non-uniform illumination across the field of view was simulated by tapering both the delta function magnitudes and the photobleaching rate constants according to an apodizing function with circular symmetry, with its symmetry axis slightly offset from the center of the 2D array. The apodizing function varied from 1.0 at the center of symmetry to a parameter-defined fraction (typically 0.75) at the periphery of the 2D array. The 2D array of virus particles was then convolved with a PSF, modeled as a Gaussian with standard deviation appropriate for an imaging system with effective NA of 1.3 and pixel spacing corresponding to Nyquist sampling for this NA. Small random defocus errors, uncorrelated between successive images of the bleach series, were modeled by varying the width of the PSF randomly over a small range, typically by an amount corresponding to a maximum defocus error of 0.15 microns. Finally Poisson noise corresponding to the mean intensity among virus particles was

added to the 2D array of blurred delta functions, and the background and camera offset/readout noise arrays were added.

Five to ten simulated bleach series of 15 to 50 time points each were created for each test dataset, comprising 1000 to 10,000 virus particles. Program parameters were held constant across bleach series within a set, but a different spatially modulated background and a different set of random x-y locations of virus particles across the 2D array was generated for each bleach series in the set. The simulated datasets were analyzed with the same suite of image analysis programs as used for the real data.

### *Modeling of mCherryFP dark states and photobleaching*

The photochemical transitions in mCherryFP under different illumination conditions were modeled by numerical integration of the set of linked differential equations using the COPASI software for biochemical systems simulation (<http://copasi.org/>). The basic 4-state model, taken from (Dean et al., 2011), included the normal ground state G0, the excited singlet state S1, and two non-fluorescent dark states, D0 and D1. At the rate of excitation achieved in a wide-field microscope, the transition from D0 to G0 is rate limiting. Both S1 and D1 are subject to irreversible photobleaching. The 5-state model incorporated another fluorescent singlet state that is more stable against photobleaching than S1, accessible from S1 via a pathway with limited flux. At low rates of excitation, most of S1 enters the photostable state, but as the excitation rate increases, the transition to the photostable state cannot keep up, leading to increased photobleaching of the FP.

### *Toxoplasma gondii culture and transformation.*

*T. gondii* was propagated on monolayer cultures of human foreskin fibroblasts (Roos et al., 1994), and transformed with plasmid DNA as previously described (Hu et al., 2006). For tagging endogenous genes with FP's by homologous replacement, the loxP/Cre recombinase "knock-in" plasmid pTKO-II and protocol (Heaslip et al., 2010) were employed, using the RH-ΔHX parasite strain.

# Discussion

In this paper I report the construction and characterization of a set of standards for calibrating quantitative fluorescence intensity measurements on cellular macromolecular assemblies tagged with any of seven different fluorescent proteins. These virus-based reagents have a number of advantages over other proposed standards, including ease of preparation, low cost, indefinite lifetime, long-term reproducibility, and straightforward extension to new FP as they become available. Two applications of the standards to counting molecules in the human parasite *Toxoplasma gondii* were described. As an aid to the effective use of these or other fluorescent standards, I have also highlighted the potential complications and sources of inaccuracy and imprecision that users are likely to encounter.

## *Factors affecting the accuracy and precision of counting FP molecules in cells*

Most of the factors that could in theory influence the accuracy counting molecules by use of quantitative fluorescence measurements are in practice insignificant contributors. The CCD detectors in common use for wide-field microscopy respond linearly to variations in photon input over their entire range up to saturation. The fluorescence emitted from an ensemble of FP molecules is, in microscope measurements, strictly proportional to the number of molecules in the assembly. The “inner filter” effects that bedevil spectroscopic measurements, arising from attenuation of excitation intensity along the beam path due to absorption by the fluorophore plus re-absorption of the emitted fluorescence, are easily seen in cuvette measurements, but are unlikely to become significant in a microscope measurement on cellular components. For instance, knowing the optical cross-section (from the extinction coefficient) of mCherry, and the dimensions of the *Toxoplasma* conoid and Sindbis virus, we can treat them as nano-cuvettes and calculate the fraction of the excitation light that would be absorbed by the “front” side of the conoid or virus particle and thus be unavailable to FP molecules on the “back” side. For the conoid that fraction is 0.02%. The extinction coefficient of mCherry is lower at its emission wavelength than at its excitation wavelength, therefore the maximum re-absorption of emitted fluorescence is even smaller, limiting the total “inner filter” effect to less than 0.04%. In the fluorescent Sindbis virus, the FP is much more “concentrated” than in the conoid, but even for the virus particles the maximum inner filter effect is less than 10%.

One source of non-linearity that can be achieved in some microscopes is ground state depletion due to the intense excitation plus the finite lifetime of the excited singlet or triplet states. However, that is a problem only in confocal or 2-photon microscopes. In a wide-field microscope the irradiance is too low to cause significant ground state depletion. For instance, each mCherry molecule in the experiments reported here is excited and emits a photon approximately once every 10 milliseconds, but its fluorescence lifetime is only 1.5 nanoseconds. Therefore occupancy of the excited singlet state decreases the ground state population by less than one part in 5 million.

There are several sources of inaccuracy that are potentially serious, but can be minimized by careful attention to the measurement and analysis procedures. Significant temporal variations in excitation intensity are nearly universal with mercury arc lamps, and spatial variation across the field of view is also common. Using the proposed “HalfYield” as the measure of brightness instead of a single time-point measure of fluorescence eliminates both of those sources of error. Difficulties in accounting accurately for background fluorescence have a surprisingly large effect on the precision of the measurements. Many different computational methods for estimating and subtracting the background fluorescence were explored. The problem is merely a practical one, but nevertheless remains an

important limitation on the precision of the measurements, whether carried out with a fully automated procedure, or by interactive manual virus identification and measurement. After many trials, the best performance was found to be with a fully automated procedure for the virus images, using the algorithm described in Methods.

The underlying difficulty with any protocol for estimating background is the need to sum signal intensities over a sufficiently large area to allow for the effect of inescapable small defocus errors. One might think of using only the peak intensity in the image of each virus particle as a measure of its brightness, but at the high NA required for fluorescence imaging of these particles, the peak intensity is exquisitely sensitive to minuscule errors in focus (~20% decrease for 0.1  $\mu\text{m}$  error). The total intensity summed over the entire area of the PSF is much less sensitive, but the summation must be taken over a large enough region to include the defocussed PSF (at NA 1.3, a defocus error of 0.1  $\mu\text{m}$  approximately doubles the diameter of the PSF). Thus to allow for the possibility (near-certainty) of small random defocus errors, the area of summation must be enlarged by roughly four-fold. Any error in estimating the true background, again a near certainty if the background changes significantly over this spatial scale, is thus greatly magnified in the final result.

The most important sources of inaccuracy when using the fluorescence of FP's to count molecules are unfortunately also the least understood and most difficult to control, namely the complex photophysics of the FP and its sensitivity local chemical environment. Several examples of this were encountered in the work reported here, stemming from the existence of both transient and long-lived dark states. The good news is that it seems the FP photophysical behavior suffers from the same eccentricities when incorporated in the virions used for fluorescent standards as when in cellular assemblies. To ensure that these eccentricities are in fact shared, it is important to demonstrate that the "photobleaching" rates for the fluorescent standards and the cellular unknown are the same when measured under identical illumination conditions.

The Sindbis virus fluorescent standards are sub-resolution objects, and the two applications described here both involve cellular organelles that are less than 1  $\mu\text{m}$  in diameter, small enough for all of their fluorescence emission to be captured in images acquired at a single focal plane. In a wide-field microscope with high NA objective and commonly used light sources, the total intensity in the image of a fluorescent point object does not change with defocus out to several microns away from the in-focus plane, provided that the summation is done over the entire "geometric shadow". Thus up to one or two microns in diameter, the thickness of the target can probably be ignored to a first approximation, and images from a single focal plane could be used to measure brightness. However, extension to much larger objects will require confronting some difficult issues in 3D microscopy and 3D deconvolution.

It is necessary to be realistic about the potential accuracy and precision of counting molecules in cells using the fluorescence generated from attached FP's. As in the examples described here, the statistical uncertainty can be kept small by careful attention to detail and by averaging over a large number of measurements. A precision of the order of 5% is attainable without undue exertion. By comparison, the accuracy of the measurements can be compromised on a larger scale if the FP in a cell is influenced by factors that do not affect the fluorescent standards.

The fluorescent Sindbis viruses described here have important uses extending beyond their role as calibration standards for counting FP molecules. As described previously (Murray et al., 2007) bright but photobleachable small particles are powerful tools for evaluating performance of

microscopes used for 3D fluorescence microscopy. Given the assurance that the particles are all identical, and the ability to generate essentially unlimited quantities on demand, the utility of these tools is enormously increased.

A useful characterization of fluorescent proteins has been proposed (Shaner et al., 2008) for the purposes of comparing photostability. In that application, a measurement of the power of the excitation light source is used to give a theoretically predicted photon emission rate per FP molecule, which is then combined with an experimental measurement of “photobleaching” rate (i.e., rate of irreversible fluorophore destruction plus rate of reversible conversion to a very long-lived dark state) to yield a predicted half-time under standardized illumination conditions. This measure is quite useful for comparing the photostability of different fluorescent proteins, but the derived parameter would need to be used with extreme caution for quantitating the the number of FP molecules in a sample, as it is based on a theoretically predicted rather than the actual observed photon emission rate from the FP.



## Acknowledgements

I am grateful to Dr. Richard Day, Indiana University School of Medicine, for providing plasmid DNA encoding several fluorescent proteins, and to Dr. Suchetana Mukhopadhyay for plasmid TE12. I thank Dr. Yu-Chen Hwang and Kulika Chomvong for assistance in bacterial expression and purification of mCherryFP and EGFP proteins, Dr. Joseph Stampfli, Department of Mathematics, Indiana University, for insights on the aggregate statistical properties of mixtures of different populations, and Drs. Ke Hu, Jacqueline Leung and Jun Liu, Department of Biology, Indiana University, for helpful discussions and critical reading of the manuscript. I am indebted to Dr. Owen Saxton (University of Cambridge) for providing the source code for his “Semper” image processing package. Dr. Jim Powers in the Light Microscopy Imaging Center and Dr. Barry Stein in the Electron Microscopy Center at IU Bloomington provided invaluable assistance with fluorescence microscopy and electron microscopy respectively.

# Bibliography

- Amos, L. A. (1977). Arrangement of high molecular weight associated proteins on purified mammalian brain microtubules. *J. Cell Biol.* **72**, 642-654.
- Bai, X.-c., McMullan, G. and Scheres, S. H. W. (2014). How cryo-EM is revolutionizing structural biology. *Trends in Biochemical Sciences* **40**, 49-57.
- Costantini, L. M., Fossati, M., Francolini, M. and Snapp, E. L. (2012). Assessing the Tendency of Fluorescent Proteins to Oligomerize Under Physiologic Conditions. *Traffic* **13**, 643-649.
- Cranfill, P. J., Sell, B. R., Baird, M. A., Allen, J. R., Lavagnino, Z., de Gruiter, H. M., Kremers, G.-J., Davidson, M. W., Ustione, A. and Piston, D. W. (2016). Quantitative assessment of fluorescent proteins. *Nat Meth* **13**, 557-562.
- Day, R. N. and Davidson, M. W. (2014). The fluorescent protein revolution. In *Series in cellular and clinical imaging*, pp. xiv, 333 pages: CRC Press.
- Dean, K. M., Lubbeck, J. L., Binder, J. K., Schwall, L. R., Jimenez, R. and Palmer, A. E. (2011). Analysis of Red-Fluorescent Proteins Provides Insight into Dark-State Conversion and Photodegradation. *Biophysical Journal* **101**, 961-969.
- Faruqi, A. R., Henderson, R. and Subramaniam, S. (1999). Cooled CCD detector with tapered fibre optics for recording electron diffraction patterns. *Ultramicroscopy* **75**, 235-250.
- Giepmans, B. N., Adams, S. R., Ellisman, M. H. and Tsien, R. Y. (2006). The fluorescent toolbox for assessing protein location and function. *Science* **312**, 217-24.
- Grigorieff, N. (2013). Direct detection pays off for electron cryo-microscopy. *eLife* **2**, e00573.
- Harapin, J., Eibauer, M. and Medalia, O. (2013). Structural Analysis of Supramolecular Assemblies by Cryo-Electron Tomography. *Structure* **21**, 1522-1530.
- Heaslip, A. T., Ems-McClung, S. C. and Hu, K. (2009). TgICMAP1 is a novel microtubule binding protein in *Toxoplasma gondii*. *PLoS ONE* **4**, e7406.
- Heaslip, A. T., Dzierszinski, F., Stein, B. and Hu, K. (2010). TgMORN1 is a key organizer for the basal complex of *Toxoplasma gondii*. *PLoS Pathog* **6**, e1000754.
- Hernandez, R., Sinodis, C. and Brown, D. T. (2010). Sindbis virus: propagation, quantification, and storage. *Curr Protoc Microbiol* **Chapter 15**, Unit15B 1.
- Hu, K., Johnson, J., Florens, L., Fraunholz, M., Suravajjala, S., DiLullo, C., Yates, J., Roos, D. S. and Murray, J. M. (2006). Cytoskeletal components of an invasion machine--the apical complex of *Toxoplasma gondii*. *PLoS Pathog* **2**, 121-138.
- Jose, J., Tang, J., Taylor, A. B., Baker, T. S. and Kuhn, R. J. (2015). Fluorescent Protein-Tagged Sindbis Virus E2 Glycoprotein Allows Single Particle Analysis of Virus Budding from Live Cells. *Viruses* **7**, 6182-99.
- Lloyd, G. (2009). Alphaviruses. In *Principles and practice of clinical virology*, (eds A. J. Zuckerman J. E. Banatvala B. D. Schoub P. D. Griffiths and P. Mortimer), pp. 643-668. Chichester, UK ; Hoboken, NJ: John Wiley & Sons.
- Lustig, S., Jackson, A. C., Hahn, C. S., Griffin, D. E., Strauss, E. G. and Strauss, J. H. (1988). Molecular basis of Sindbis virus neurovirulence in mice. *Journal of Virology* **62**, 2329-36.
- Markwardt, M. L., Kremers, G. J., Kraft, C. A., Ray, K., Cranfill, P. J., Wilson, K. A., Day, R. N., Wachter, R. M., Davidson, M. W. and Rizzo, M. A. (2011). An improved cerulean fluorescent protein with enhanced brightness and reduced reversible photoswitching. *PLoS ONE* **6**, e17896.
- Morrisette, N. S. and Sibley, L. D. (2002). Cytoskeleton of apicomplexan parasites. *Microbiol Mol Biol Rev* **66**, 21-38; table of contents.

- Mukhopadhyay, S., Zhang, W., Gabler, S., Chipman, P. R., Strauss, E. G., Strauss, J. H., Baker, T. S., Kuhn, R. J. and Rossmann, M. G. (2006). Mapping the structure and function of the E1 and E2 glycoproteins in alphaviruses. *Structure* **14**, 63-73.
- Murray, J. M. (2007). Practical aspects of quantitative confocal microscopy. *Methods Cell Biol* **81**, 467-78.
- Murray, J. M., Appleton, P. L., Swedlow, J. R. and Waters, J. C. (2007). Evaluating performance in three-dimensional fluorescence microscopy. *Journal of Microscopy* **228**, 390-405.
- Nagayasu, E., Zhang, F., Hu, K., Ananvoranich, S. and Murray, J. M. (2006). Cytoskeletal components of an invasion machine: The apical complex and conoid of *Toxoplasma gondii*. In *American Society for Cell Biology 46th Annual Meeting*, vol. 22, pp. 293. San Diego, CA.
- Nagayasu, E., Hwang, Y.-c., Liu, J., Murray, J. and Hu, K. (2016). Loss of a doublecortin (DCX) domain containing protein causes structural defects in a tubulin-based organelle of *Toxoplasma gondii* and impairs host cell invasion. *bioRxiv*.
- Rice, C. M., Levis, R., Strauss, J. H. and Huang, H. V. (1987). Production of infectious RNA transcripts from Sindbis virus cDNA clones: mapping of lethal mutations, rescue of a temperature-sensitive marker, and in vitro mutagenesis to generate defined mutants. *Journal of Virology* **61**, 3809-19.
- Roos, D. S., Donald, R. G., Morrisette, N. S. and Moulton, A. L. (1994). Molecular tools for genetic dissection of the protozoan parasite *Toxoplasma gondii*. *Methods in Cell Biology* **45**, 27-63.
- Russell, D. G. and Burns, R. G. (1984). The polar ring of coccidian sporozoites: a unique microtubule-organizing centre. *Journal of Cell Science* **65**, 193-207.
- Saxton, W. O., Pitt, T. J. and Horner, M. (1979). Digital Image-Processing - Semper System. *Ultramicroscopy* **4**, 343-353.
- Schmaljohn, A. L. and McClain, D. (1996). Alphaviruses (Togaviridae) and Flaviviruses (Flaviviridae) In *Medical Microbiology*, (ed. S. Baron). Galveston (TX): University of Texas Medical Branch at Galveston;
- Shaner, N. C., Lin, M. Z., McKeown, M. R., Steinbach, P. A., Hazelwood, K. L., Davidson, M. W. and Tsien, R. Y. (2008). Improving the photostability of bright monomeric orange and red fluorescent proteins. *Nat Methods* **5**, 545-51.
- Shaner, N. C., Lambert, G. G., Chammas, A., Ni, Y., Cranfill, P. J., Baird, M. A., Sell, B. R., Allen, J. R., Day, R. N., Israelsson, M. et al. (2013). A bright monomeric green fluorescent protein derived from *Branchiostoma lanceolatum*. *Nat Methods* **10**, 407-9.
- Sinnecker, D., Voigt, P., Hellwig, N. and Schaefer, M. (2005). Reversible photobleaching of enhanced green fluorescent proteins. *Biochemistry* **44**, 7085-94.
- Steel, R. G. D., Torrie, J. H. and Dickey, D. A. (1997). Principles and procedures of statistics : a biometrical approach. New York: McGraw-Hill.
- Taylor, J. R. (1982). An introduction to error analysis : the study of uncertainties in physical measurements. Mill Valley, Calif.: University Science Books.
- Verdaasdonk, J. S., Lawrimore, J. and Bloom, K. (2014). Determining absolute protein numbers by quantitative fluorescence microscopy. *Methods in Cell Biology* **123**, 347-65.
- Wu, Y., Chandris, P., Winter, P. W., Kim, E. Y., Jaumouill, V., Kumar, A., Guo, M., Leung, J. M., Smith, C., Rey-Suarez, I. et al. (2016). Simultaneous multiview capture and fusion improves spatial resolution in wide-field and light-sheet microscopy. *Optica* **3**, 897-910.

- Zacharias, D. A., Violin, J. D., Newton, A. C. and Tsien, R. Y. (2002). Partitioning of Lipid-Modified Monomeric GFPs into Membrane Microdomains of Live Cells. *Science* **296**, 913-916.
- Zhang, F., Nagayasu, E. and Murray, J. M. (2007). In *2007 (18th) Annual Molecular Parasitology Meeting*. Woods Hole, MA.
- Zhou, Z. H. (2011). Atomic resolution cryo electron microscopy of macromolecular complexes. *Adv Protein Chem Struct Biol* **82**, 1-35.
